# Supplementary material for: Size-and phase-dependent structure of copper(ii) oxide nanoparticles
Source: Royal Society of Chemistry journal article supplement (doi:10.1039/c5ra04276c), 2015-01-01
Supplement: c5ra04276c1.pdf [file c5ra04276c1.pdf]

## Supplementary Information

### Size-and Phase-Dependent Structure of Copper (II) Oxide Nanoparticles

Alauddin Ahmed, Paolo Elvati, and \*Angela Violi  
Department of Mechanical Engineering  
University of Michigan  
Ann Arbor, Michigan 48109-2125, United States

(\*All Correspondence should be made to: avioli@umich.edu)

#### I. Potential energy profiles for a 4 nm particle

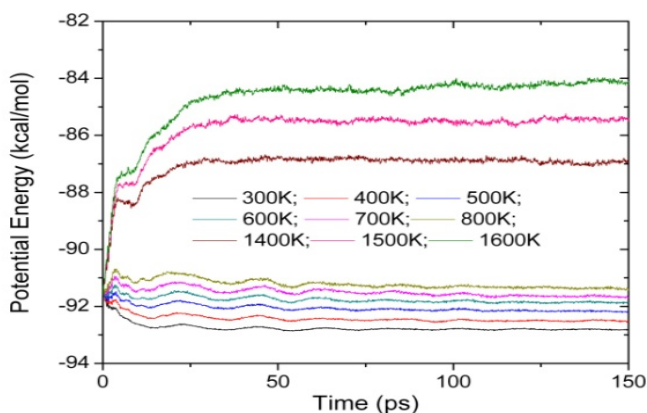

**Figure S1.** Potential energy profiles of a 4nm particle as a function of time at different temperatures.

#### II. Melting point empirical model

We used the model proposed by Jiang and Shi<sup>1</sup> to calculate the melting temperature as a function of nanoparticle size,  $T_m(r)$  using the relation:

$$\frac{T_m(r)}{T_m(\infty)} = \exp \left[ (1 - \alpha) / \left( \frac{r}{r_0} - 1 \right) \right] \quad (1)$$

where  $T_m(\infty)$  is the bulk melting point of CuO (1600 K),  $r_0$  is minimum radius and  $\alpha$  is material specific constant.

$$r_0 = (3 - d)h$$

where the  $d = 0$  for spherical nanoparticles and  $h$  is the atomic diameter of CuO (0.6845 nm).<sup>2,3</sup> The constant  $\alpha$  is calculated using the equation:

$$\alpha = \frac{2S_{vib}}{3R} + 1$$

where  $S_{vib}(\infty) = 7.016 \text{ J/mol.K}^3$  is the bulk melting entropy and  $R = 8.31 \text{ J/mol.K}$  is the ideal gas constant. This method has been used extensively for the prediction of size-dependent thermophysical properties of many different nanoparticles including metal oxides.<sup>4,5</sup> It should be noted that Equation (1) is valid for nanoparticles of radii  $r \geq 2r_0 \approx 3h$ .<sup>1</sup>

### III. XRD temperature dependence

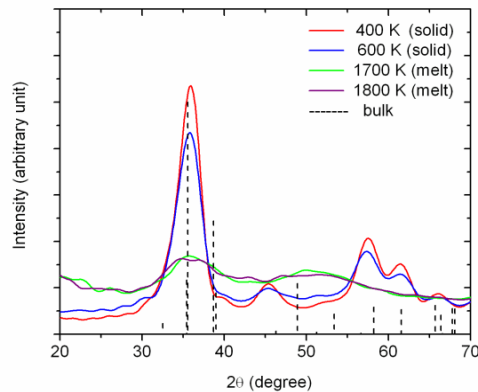

**Figure S2.** XRD profiles of CuO nanoparticles of diameter 4 nm at different temperatures.

### References

- 1 Z. Zhang, X. X. Lu and Q. Jiang, *Phys. B*, 1999, **270**, 249–254.
- 2 X. Zheng, C. Xu, K. Nishikubo, K. Nishiyama, W. Higemoto, W. Moon, E. Tanaka and E. Otake, *Phys. Rev. B*, 2005, **72**, 014464.
- 3 X. Lang and Q. Jiang, *Front. Phys. China*, 2007, **2**, 289–311.
- 4 P. A. Bhatt, A. Pratap and P. K. Jha, *J. Therm Anal Calorim*, 2012, **110**, 535–538.
- 5 S. Mishra, S. K. Gupta, P. K. Jha and A. Pratap, *Mater. Chem. Phys.*, 2010, **123**, 791–794.
